# Supplementary material for: Phase behavior of polyisoprene-poly(butylene oxide) and poly(ethylene-alt-propylene)-poly(butylene oxide) block copolymers
Source: Royal Society of Chemistry journal article supplement (doi:10.1039/b920678g), 2010-01-01
Supplement: b920678g.pdf [file b920678g.pdf]

## ***Supporting Information***

### Phase Behavior of Polyisoprene-Poly(butylene oxide) and Poly(ethylene-*alt*-propylene)-Poly(butylene oxide) Block Copolymers

*Ning Zhou, Timothy P. Lodge, and Frank S. Bates*

Department of Chemical Engineering & Materials Science and Department of Chemistry,

University of Minnesota, Minneapolis, Minnesota 55455

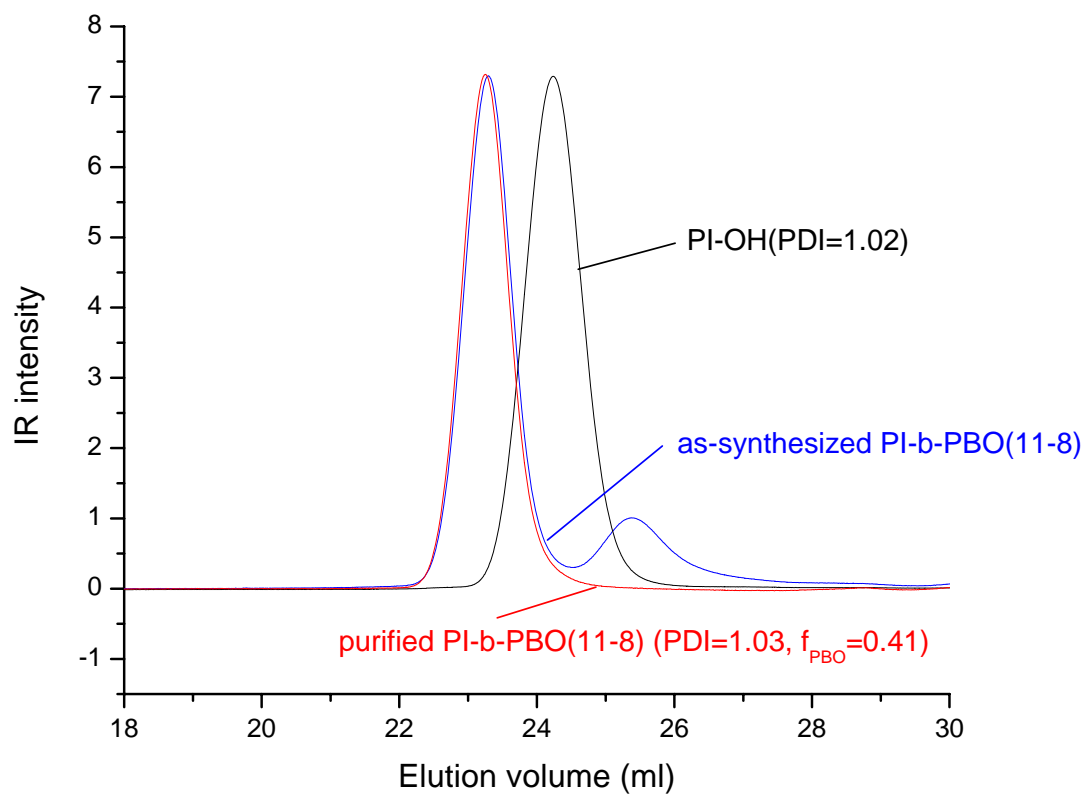

**Figure S1.** SEC profiles of PI-OH precursor ( $M_n = 10,850$  g/mol), PI-*b*-PBO(11-8) diblock copolymer before and after purification.

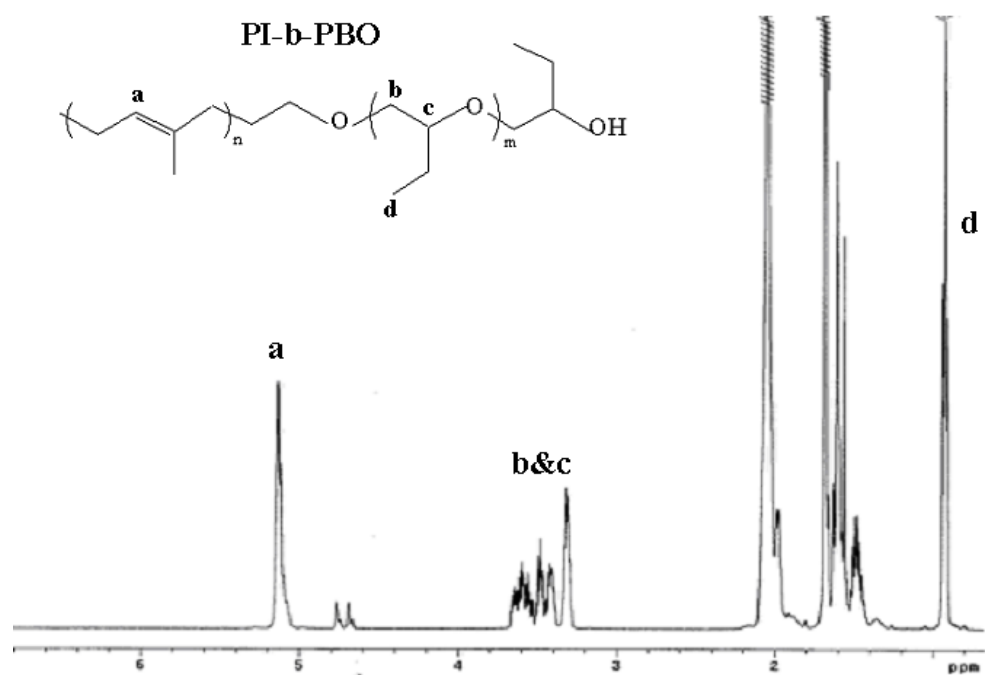

**Figure S2.** <sup>1</sup>H NMR (500 Hz) spectrum of the purified IB(39-22) diblock copolymer.

a)

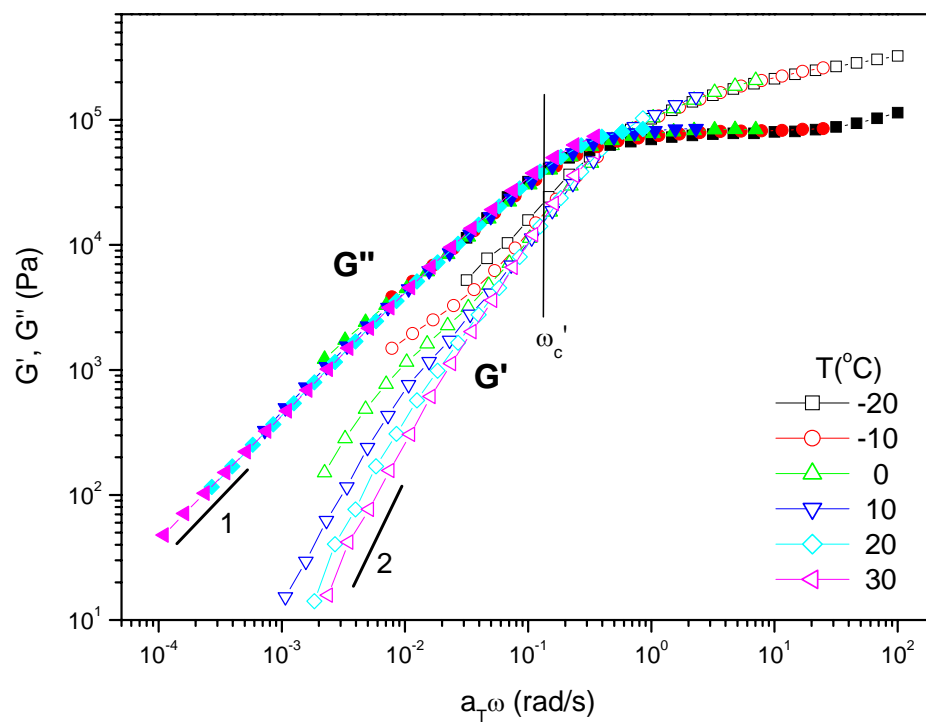

b)

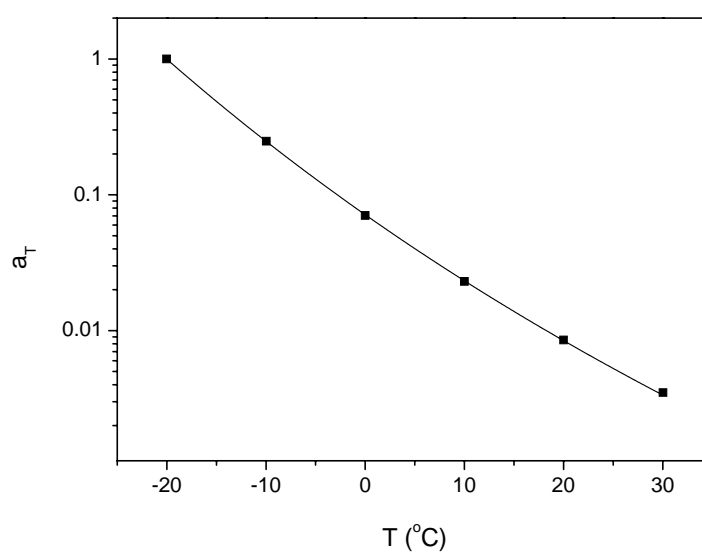

c)

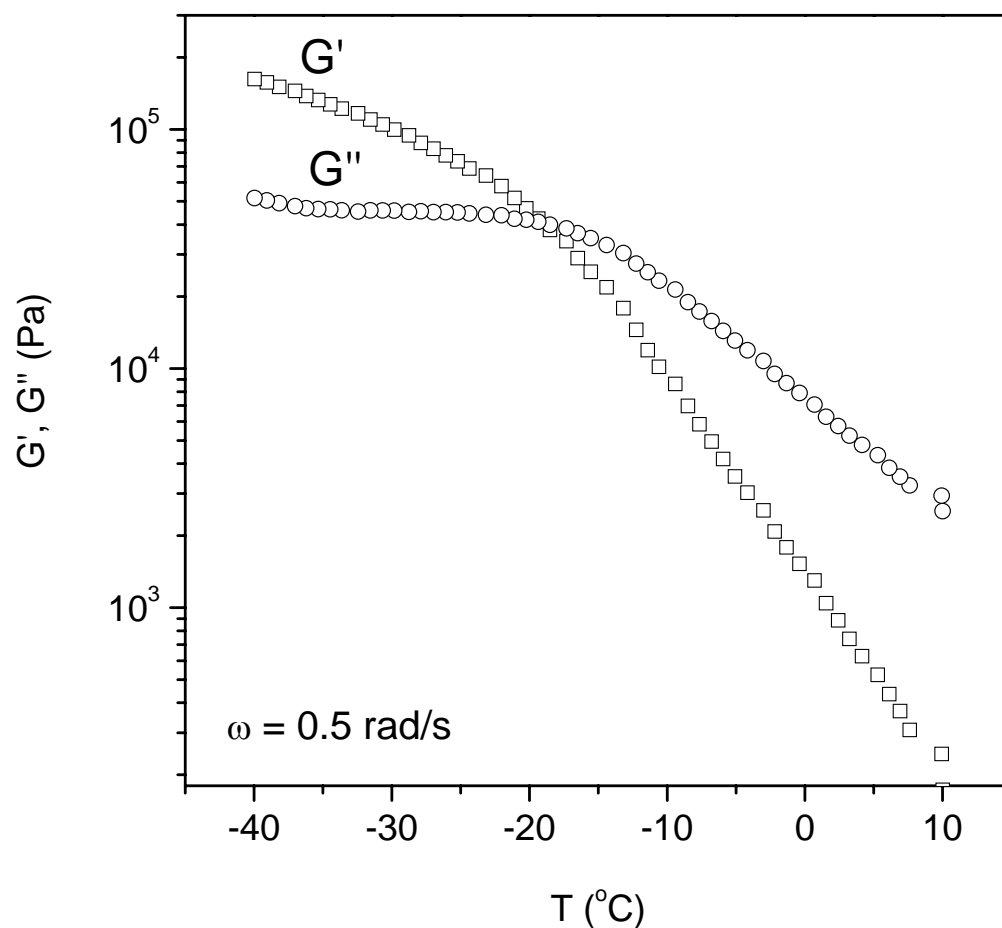

**Figure S3.** a) Reduced frequency plot for representative dynamic elastic and loss data obtained from the IB(39-22) copolymer. Shift factors were determined by concurrently superimposing  $G'$  (open symbols) and  $G''$  (filled symbols) for  $\omega > \omega_c'$  and  $\omega > \omega_c''$ , respectively, to the  $-20$  °C data. b) Shift factors as a function of temperature, fitted with the WLF equation. c) Dynamic temperature ramp data for IB(39-22) at the frequency of 0.5 rad/s upon cooling.
